# Supplementary material for: Infarct volume after glioblastoma surgery as an independent prognostic factor
Source: PubMed Central journal article supplement (PMC5308702; doi:10.18632/oncotarget.11482), 2016-08-22
Supplement: oncotarget-07-61945-s001.pdf [file oncotarget-07-61945-s001.pdf]

## Infarct volume after glioblastoma surgery as an independent prognostic factor

### Supplementary Materials

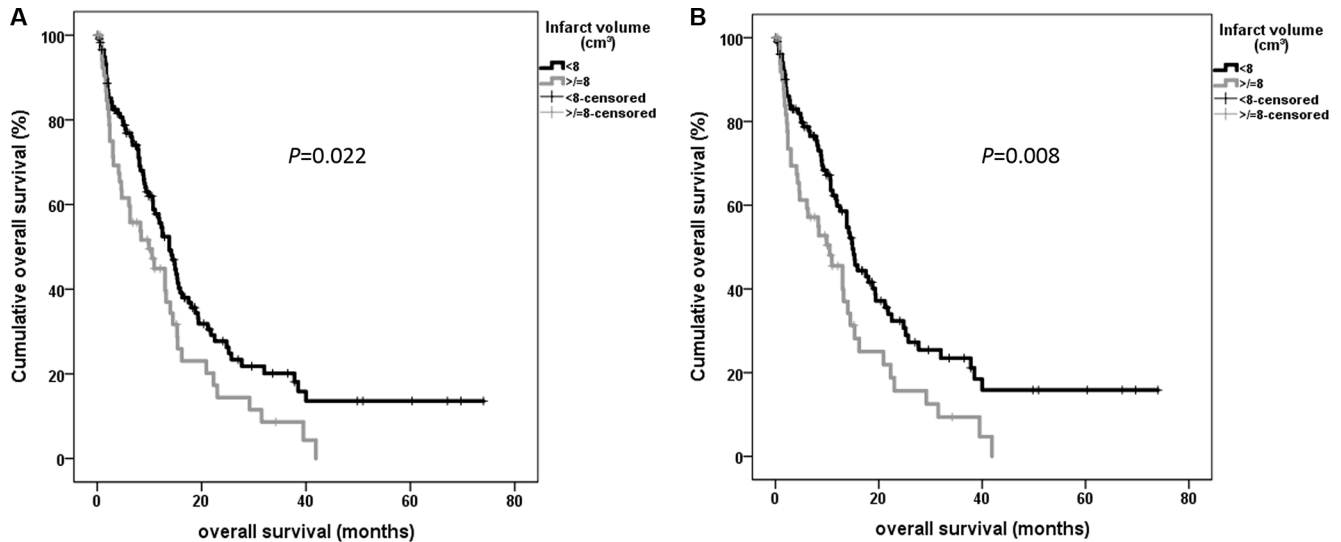

Supplementary Figure S1: Univariate survival analysis using Kaplan-Meier for dichotomized infarct volume for the subgroup of patients without rim-like infarctions (A) and for patients without rim-like infarctions and total and near-total tumor resection (> 90%) (B).
